# Supplementary material
Source: Springer Nature journal article supplement (https://www.springermedizin.de/resource/supplementary/12879_2013_2646_MOESM2_ESM.pdf/9445062)

580 documents identified  
325 from search results  
255 from follow-up

143 duplicates, dead links,  
and non-English articles  
rejected

437 abstracts reviewed

70 abstracts did not meet  
inclusion criteria

367 articles retrieved and  
reviewed

256 articles had an incubation  
period estimate, including  
26 with individual-level data

111 articles had no incubation  
period estimate, including  
7 with individual-level data

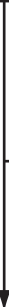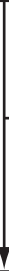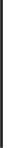

Supplement: MOESM2 [file 9445062]
